# Supplementary material
Source: MDPI journal article supplement (https://www.mdpi.com/2227-9717/9/11/2072)
Supplement: s1 [file s1 › processes-1405768-SI.pdf]

Article

# A Comparison of Uric Acid Optical Detection Using As Sensitive Materials an Amino-Substituted Porphyrin and Its Nanomaterials with CuNPs, PtNPs and Pt@CuNPs

Camelia Epuran <sup>1</sup>, Ion Fratilescu <sup>1</sup>, Diana Anghel <sup>1</sup>, Mihaela Birdeanu <sup>2</sup>, Corina Orha <sup>2</sup>  
and Eugenia Fagadar-Cosma <sup>1,\*</sup>

<sup>1</sup> Institute of Chemistry “Coriolan Dragulescu”, Mihai Viteazu Ave. 24, 300223 Timisoara, Romania; ecamelia@acad-icht.tm.edu.ro (C.E.); ionfratilesco@acad-icht.tm.edu.ro (I.F.); danghel@acad-icht.tm.edu.ro (D.A.)

<sup>2</sup> National Institute for Research and Development in Electrochemistry and Condensed Matter, Plautius Andronescu Street 1, 300224 Timisoara, Romania; mihaione2002@yahoo.com (M.B.); orha.corina@gmail.com (C.O.)

\* Correspondence: efagadar@yahoo.com or efagadarcosma@acad-icht.tm.edu.ro

## 2.9. Obtaining of hybrid complex between CuNPs and TAmPP porphyrin

In order to confirm our presumptions, that a possible coordinations of CuNPs by nitrogen atoms in the core of porphyrin might take place, we synthesized Cu(II)-TAmPP metalloporphyrin by classical metalation reaction with dihydrated CuCl<sub>2</sub> [30-from main text].

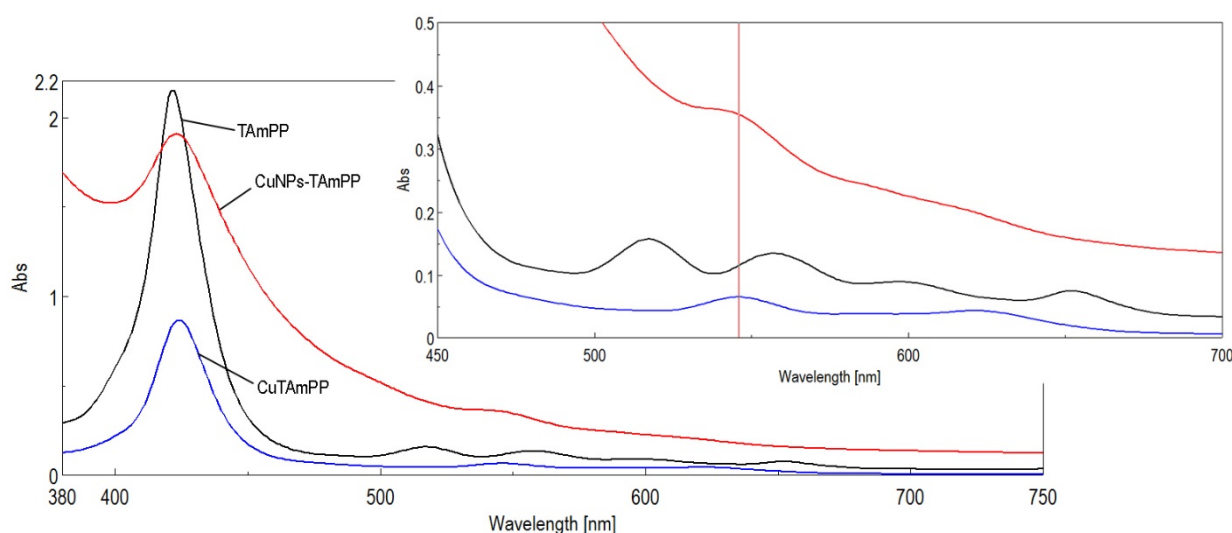

**Figure S1.** Overlapped UV-Vis spectra of 5,10,15,20-tetrakis(4-amino-phenyl)porphyrin (TAmPP), its complex with CuNPs and Cu(II)- 5,10,15,20-tetrakis(4-amino-phenyl)porphyrin (CuTAmPP).

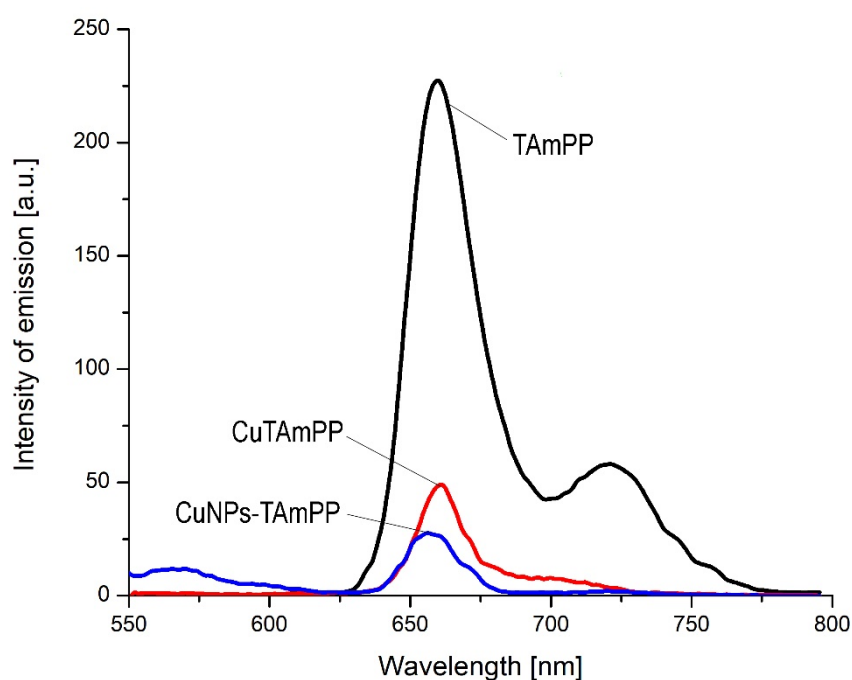

**Figure S2.** Emission spectra of TAMPP, CuNPs-TAMPP complex CuTAMPP.

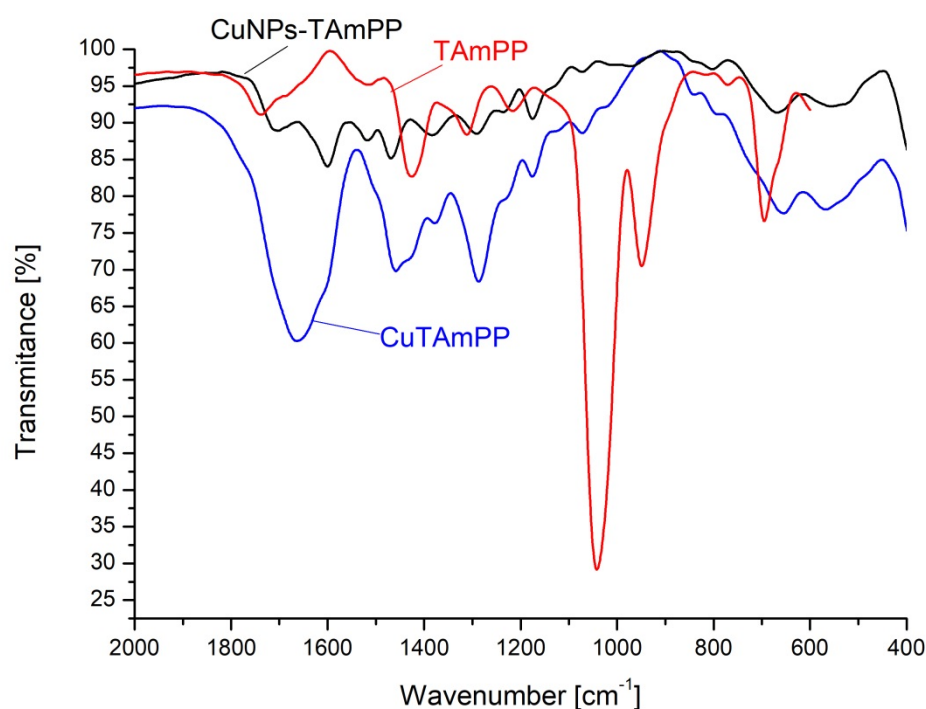

**Figure S3.** FT-IR superposed spectra of CuNPs-TAMPP complex and CuTAMPP metalloporphyrin.

### 3.2. Detection of uric acid with TAMPP-CuNPs hybrid material

To 5 mL TAMPP-CuNPs hybrid complex acidified with HCl ( $c = 0.01$  M) to pH= 4.5 portions of 0.01 mL UA in DMSO ( $c = 2.974 \times 10^{-4}$  M) were added and stirred for 1 minute, at room temperature. The UV-vis spectra were registered as represented in Figure S1. The QI band of the TAMPP-CuNPs hybrid is manifesting a significant hyperchromic effect and is hypsochromically shifted with 11 nm, and enlarged in the wavelength range of 700–860

nm. The QII band also has a hypsochromic shift of 7 nm. As can be seen from the AFM image of TAmPP-CuNPs hybrid complex after exposure to UA, the morphology of the surface is completely changed in comparison with the TAmPP-CuNPs hybrid complex. Triangular architectures of around 240 nm oriented in the same direction and completely covering the surface can be observed, due to both J and H-type aggregations produced by porphyrins in their interaction with UA.

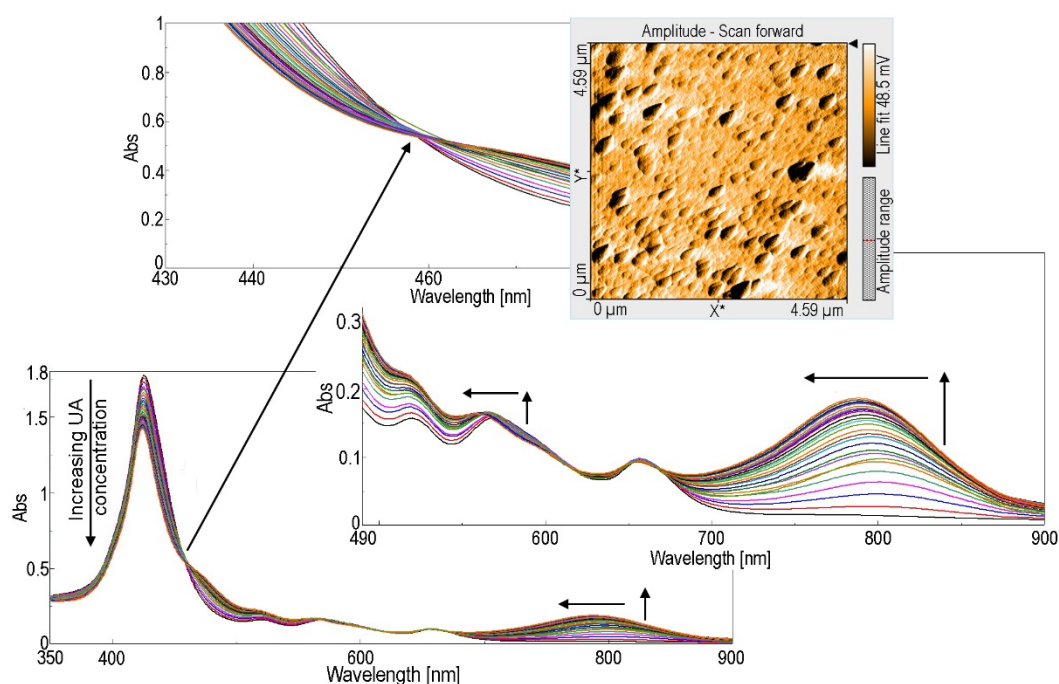

**Figure S4.** The UV-vis spectra registered by adding UA to TAmPP-CuNPs complex in DMSO solution; AFM image of TAmPP-CuNPs complex after exposure to UA.

The linear dependence between the intensity of the Soret band and the concentration of UA is linear in the range of  $5.003 \times 10^{-6}$  -  $1.4008 \times 10^{-5}$  M (Figure S2).

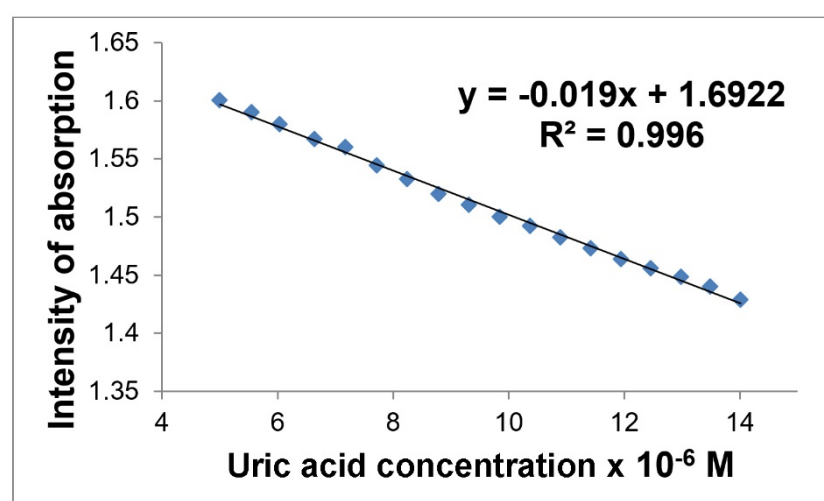

**Figure S5.** Linear dependence between the intensity of the Soret band and the concentration of UA using TAmPP-CuNPs hybrid complex as sensitive material.

### 3.2.1. Interference study

As described in Subsections 3.1.1, the effect of interfering species was investigated using the same ions and molecules at 1000-fold higher concentrations than the UA.

Figures S3 and S4 proved that the UV-vis spectrophotometric method is capable of good selectivity toward UA determination in the presence of glucose (Glu), ascorbic acid (AA), NaCl, KCl, MgSO<sub>4</sub>, KI, lactic acid (LA). The significant interference ion, is salicylate anion, and so that the analysis is not accurate in the presence of CH<sub>3</sub>COONa and is critical in the presence of SS.

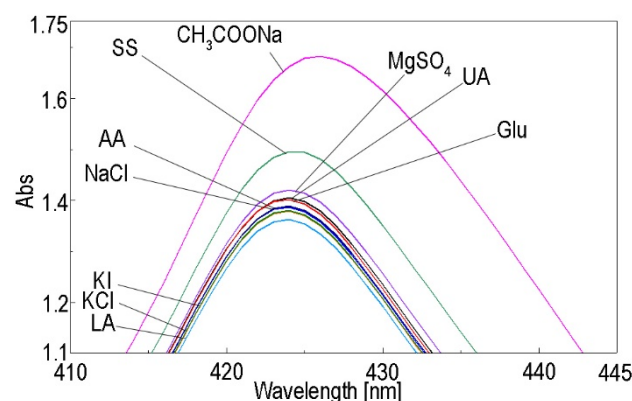

**Figure S6.** Overlapped UV-vis spectra representing the influence of diverse interfering species: glucose (Glu), ascorbic acid (AA), NaCl, KCl, CH<sub>3</sub>COONa, MgSO<sub>4</sub>, KI, lactic acid (LA), sodium salicylate (SS), on the TAmPP-CuNPs hybrid complex at concentrations 1000-fold higher than UA.

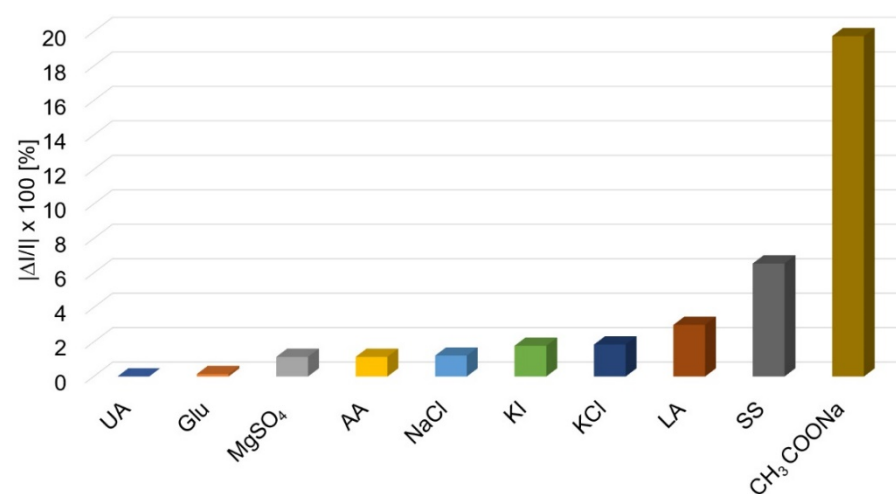

**Figure S7.** Average percentage errors for UA optical detection using TAmPP-CuNPs hybrid complex, introduced by different interferences.
